# Supplementary material for: Kinetic, Isotherm, and Equilibrium Investigation of Cr(VI) Ion Adsorption on Amine-Functionalized Porous Silica Beads
Source: MDPI journal article supplement (doi:10.3390/polym14102104), 2022-05-21
Supplement: s1 [file s1]

## Supplementary Materials

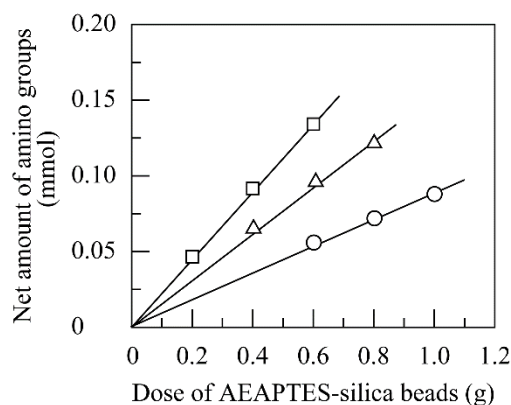

Figure S1: Changes in the net amount of amino groups with the dose of silica beads for AEAPTES-silica beads with the amount of amino groups of 0.030 ( $\triangle$ ), 0.080 ( $\square$ ), and 0.220 ( $\diamond$ ) mmol/g.

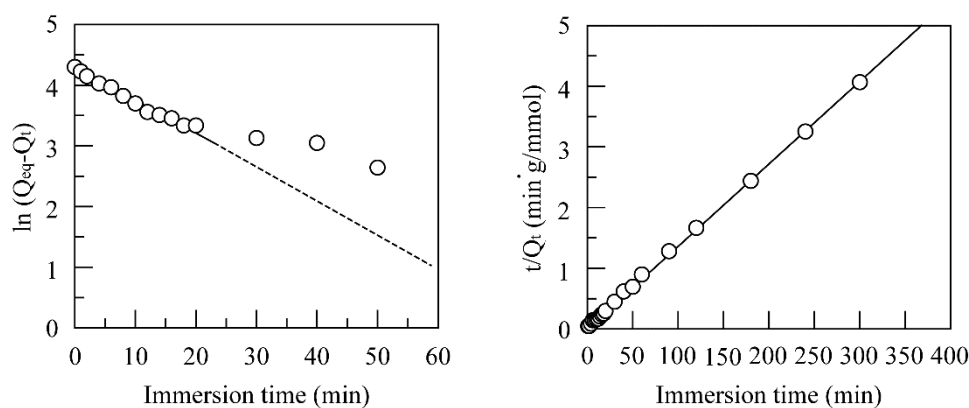

Figure S2: Determination of (a) the pseudo-first order constant,  $k_1$ , and (b) pseudo-second order constant,  $k_2$ , for adsorption of Cr(VI) ions on AEAPTES-silica beads with the amount of amino groups of 0.220 mmol/g in a 0.20 mM  $K_2Cr_2O_7$  solution at pH 3.0 and 30°C.

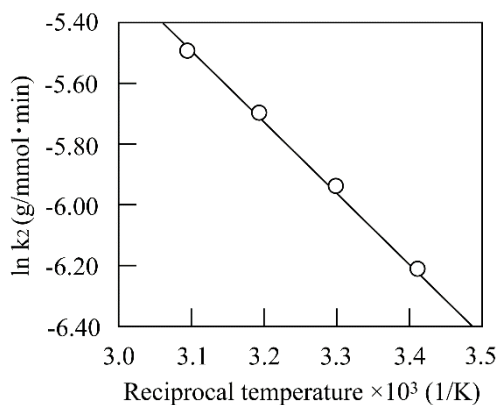

Figure S3: The linear relationship between the  $k_2$  value and the reciprocal temperature in Arrhenius plot for adsorption of Cr(VI) ions on AEAPTES-silica beads with the amount of amino groups of 0.220 mmol/g in a 0.20 mM  $K_2Cr_2O_7$  solution at pH 3.0 and 30°C.

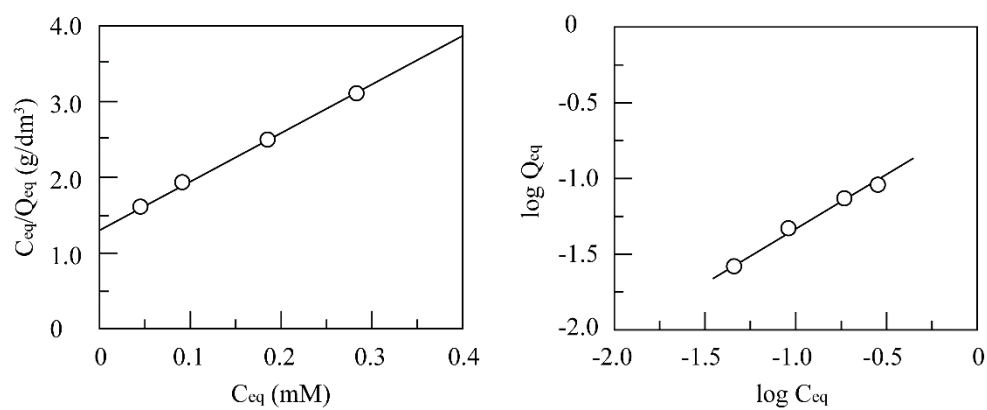

Figure S4: The linear forms of (a) Langmuir and (b) Freundlich isotherms for adsorption of Cr(VI) ions on AEAPTES-silica beads with the amount of amino groups of 0.220 mmol/g in a 0.20 mM  $K_2Cr_2O_7$  solution at pH 3.0 and 30°C.
